# Supplementary material for: Ultrasensitive detection of the H5N1 nucleic acid fragment by ICP-MS using DNA dendrimer-carried silver nanoparticle labeling
Source: Royal Society of Chemistry journal article supplement (doi:10.1039/d4an00746h), 2024-01-01
Supplement: d4an00746h1.pdf [file d4an00746h1.pdf]

Electronic Supplementary Information

**Ultrasensitive detection of H5N1 by ICP-MS with DNA dendrimer-  
carried silver nanoparticles labeling**

Chao Huang<sup>a,c,d</sup>, Yanni Jiao<sup>b</sup>, Lijun Shao<sup>b</sup>, Wei Li<sup>b</sup>, Shengyong Ding<sup>a</sup>, Dafeng  
Jiang<sup>b,\*</sup>, Wei Jiang<sup>a,\*</sup>

<sup>a</sup> *School of Chemistry and Chemical Engineering, Shandong University, 250100 Jinan, P. R. China.*

<sup>b</sup> *Shandong Academy of Preventive Medicine, Shandong Center for Food Safety Risk Assessment, Shandong Center for Disease Control and Prevention, 250014 Jinan, P. R. China.*

<sup>c</sup> *Department of Pharmacy, Affiliated Hospital of Shandong University of Traditional Chinese Medicine, Jinan 250014, P. R. China.*

<sup>d</sup> *College of Pharmacy, Shandong University of Traditional Chinese Medicine, 250355 Jinan, P.R. China.*

*Corresponding authors. Tel: 86-531-88363888; fax: 86-531-88564464.*

*E-mail addresses: jiangdf1983@163.com (Dafeng Jiang); wjiang@sdu.edu.cn (Wei Jiang)*

**Table S1** Sequences of oligonucleotides (5'-3') used in this study. The underlined letters represent mismatched bases.

| Name                          | Sequences (5'- 3')                                                                                   |
|-------------------------------|------------------------------------------------------------------------------------------------------|
| dsDNA1-a                      | Biotin-TTTTTTTTTTTTTTTAGACTCTTGAGTTCTCAGTATGTCGGT<br>GTCTGCCTGTGTGCCTATTATGTCTCTGCCTGTGTGCCTATTATGTC |
| dsDNA1-b                      | GACATAATAGGCACACGACATAATAGGCACACCACCGACATACT<br>GAGAAC                                               |
| ssDNA1                        | AGTATGTCGGTGTGTGCCTATTATGTCTGTGCCTATTATG                                                             |
| dsDNA2-a                      | Biotin-TTTTTTTTTTTTTTCACCGACATACTGAGAACTCAAGAGGAC<br>ATAATAGGCACACAGGCA                              |
| dsDNA2-b                      | GTGTGCCTATTATGTTCGTTCTCAGTATGTCGGTG                                                                  |
| ssDNA2                        | CCGACATACTGAGAACGACATAA                                                                              |
| H5N1 nucleic acid<br>fragment | CATACTGAGAACTCAAGAGTCT                                                                               |
| Mismatch-1                    | CATACTGAGAACTCAAGAGT <u>TT</u>                                                                       |
| Mismatch-3                    | CATACTGAGAACTCAAGAT <u>TATT</u>                                                                      |
| Mismatch-5                    | CATACTGAGAACTCAAT <u>TTTATT</u>                                                                      |
| Mismatch-7                    | CATACTGAGAACTC <u>TTTTTATT</u>                                                                       |

**Table S2** Operating parameters of ICP-MS with a Babington nebulizer

| <b>ICP-MS plasma</b>             | <b>Parameters</b>                    |
|----------------------------------|--------------------------------------|
| Rf power                         | 1550W                                |
| Plasma gas flow(Ar)              | 14 L min <sup>-1</sup>               |
| Auxiliary gas flow(Ar)           | 0.80 L min <sup>-1</sup>             |
| Nebulizer gas flow(Ar)           | 0.97 L min <sup>-1</sup>             |
| Sampling depth                   | 5.0 mm                               |
| Sampler/skimmer diameter orifice | Nickel 0.8 mm 0.4 mm <sup>-1</sup>   |
| Scanning mode.                   | Peak-jumping                         |
| Dwell time                       | 20ms                                 |
| Integration mode                 | Peak area                            |
| Monitored isotope                | <sup>111</sup> Cd, <sup>107</sup> Ag |

**Table S3** Comparison of this method with other methods for detection of nucleic acids.

| <b>Method</b>                                                                                       | <b>Linear range (nM)</b> | <b>LOD (nM)</b> | <b>Ref.</b>  |
|-----------------------------------------------------------------------------------------------------|--------------------------|-----------------|--------------|
| MNAzyme-catalyzed amplification assay                                                               | 0.05-1.0                 | 0.02            | [22]         |
| DNA templated silver nanoclusters<br>fluorescent probe based assay                                  | 5.0-100                  | 0.29            | [23]         |
| Assay based on DNA-silver nanocluster<br>probe                                                      | 20-1800                  | 18              | [24]         |
| One-step fast and label-free imaging array                                                          | 0.5-25                   | 0.14            | [25]         |
| Three-Segment Branched DNA-Templated<br>Fluorescent Silver Nanoclusters based assay                 | 0.5-2000                 | 0.5             | [26]         |
| Multifunctional G-quadruplex-based<br>fluorescence assay                                            | 0.5-200                  | 0.45            | [27]         |
| Personal glucose meter based assay                                                                  | 0.01-2.5                 | 0.008           | [28]         |
| Ultrasensitive detection by DNA dendrimer-<br>carried silver nanoparticles labeling using<br>ICP-MS | 0.05-2.0                 | 0.02            | This<br>work |

**Table S4** Results of H5N1 nucleic acid fragment analysis at different concentrations (n=3).

| <b>Sample</b> | <b>Added (nM)</b> | <b>Found (nM)</b> | <b>Recovery (%)</b> | <b>RSD (%)</b> |
|---------------|-------------------|-------------------|---------------------|----------------|
| 1             | 0.5               | 0.4               | 89.5                | 6.2            |
| 2             | 1.0               | 1.1               | 106                 | 5.9            |
| 3             | 1.5               | 1.5               | 98.3                | 7.5            |
